## RESEARCH ARTICLE

# Environmental exposures and adverse pregnancy outcomes in Ethiopia: A systematic review and meta-analysis

Habtamu Demelash Enyew<sup>1\*</sup>, Bethlehem Getachew Bogale<sup>2</sup>, Abebe Beyene Hailu<sup>3</sup>, Seid Tiku Mereta<sup>3</sup>

**1** Department of Public Health, College of Health Sciences, Debre Tabor University, Debre Tabor, Ethiopia,

**2** Department of Midwifery, College of Health Sciences, Madawalabu University, Robe, Ethiopia,

**3** Department of Environmental Health Science and Technology, Jimma University Institution of Health, Jimma, Ethiopia

\* [enyew29@gmail.com](mailto:enyew29@gmail.com)

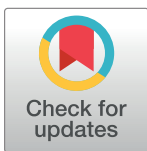

## Abstract

### Background

Maternal exposures to environmental hazards during pregnancy are key determinants of birth outcomes that affect health, cognitive and economic status later in life. In Ethiopia, various epidemiological evidences have suggested associations between environmental exposures such as household air pollution, cigarette smoking, and pesticide exposure and pregnancy outcomes such as low birth weight, preterm birth, and birth defects.

### Objective

This review aimed at generating summarized evidence on the association between maternal exposure to environmental factors (household air pollution, cigarette smoking, and pesticide) and pregnancy outcomes (birth weight, preterm birth, and birth defects) in Ethiopia.

### Method

A systematic literature search was performed using PubMed, Google Scholar, and the Cochrane Library databases. All observational study designs were eligible for inclusion in the review. Quality assessment was conducted using the Newcastle-Ottawa Scale (NOS) quality assessment tools adopted for case-control and cross-sectional studies. The random-effects model was applied in computing the pooled estimates and their corresponding 95% confidence interval (CI). Funnel and Doi plots were used for detecting the potential publication bias. All statistical analyses were performed using comprehensive meta-analysis (CMA 2.0) and MetaXL version 5.3 software.

### Result

The pooled estimates revealed that prenatal biomass fuel use increased the risk of giving a low birth weight baby by twofold (OR = 2.10, 95% CI: 1.33–3.31), and has no separate kitchen increases the risk of having low birth weight baby nearly by two and half times (OR =

## OPEN ACCESS

**Citation:** Demelash Enyew H, Bogale BG, Hailu AB, Mereta ST (2023) Environmental exposures and adverse pregnancy outcomes in Ethiopia: A systematic review and meta-analysis. PLoS ONE 18(7): e0288240. <https://doi.org/10.1371/journal.pone.0288240>

**Editor:** Mohan Kumar, KMCH Institute of Health Sciences and Research, INDIA

**Received:** June 23, 2022

**Accepted:** June 19, 2023

**Published:** July 12, 2023

**Copyright:** This is an open access article, free of all copyright, and may be freely reproduced, distributed, transmitted, modified, built upon, or otherwise used by anyone for any lawful purpose. The work is made available under the [Creative Commons CC0](https://creativecommons.org/licenses/by/4.0/) public domain dedication.

**Data Availability Statement:** All relevant data are within the manuscript and its [Supporting Information](#) files.

**Funding:** The authors received no specific funding for this work.

**Competing interests:** The authors have declared that no competing interests exist.

**Abbreviations:** ANC, Antenatal care; CA, congenital anomalies; CI, Confidence interval; LBW, Low birth

weight; NTD, Neural tube defect; OR, odds ratio; PTB, Preterm birth.

2.48, 95% CI: 1.25–4.92). Overall, using biomass fuel as the main energy source for cooking and/or having no separate kitchen from the main house is 2.37 times more likely to give low birth weight babies (OR = 2.37, 95% CI: 1.58–3.53). Active cigarette smoker women were 4 times (OR = 4.11, 95% CI: 2.82–5.89) more prone to have low birth weight babies than non-smokers; and passive smoker women were 2.6 times (OR = 2.63, 95% CI: 1.09–6.35) more risked to give low birth weight babies. It was also estimated that active cigarette smoker women were nearly 4 times (OR = 3.90, 95% CI: 2.36–6.45) more likely to give preterm birth babies. Pesticide exposure during pregnancy also increases the risk of the birth defect 4 times (OR = 4.44, 95% CI: 2.61–7.57) compared with non-exposed pregnant women.

## Conclusion

Household air pollution from biomass fuel use, active and passive cigarette smoking, and pesticide exposures are significantly associated environmental risk factors for low birth weight, preterm birth, and birth defects in Ethiopia. Therefore, Pregnant and lactating women should be aware of these environmental hazards during pregnancy. Promoting clean energy and improved and efficient stoves at the household level will help to reduce household air pollution-related adverse health effects.

## Trial registration

PROSPERO 2022: [CRD42022337140](https://doi.org/10.1186/1745-6215-140).

## Introduction

The pregnancy period is a crucial determinant of an infant's health and survival for years to come [1, 2] which has been conceptualized as the developmental origin of health and disease (DoHaD) [3]. Because, it is a critical period of development when the developing organ systems of the fetus can be more vulnerable due to higher rates of cell division or changing metabolic capabilities [1, 4, 5].

Prenatal exposure to various classes of chemicals, including household air pollution, cigarette smoking, and pesticide exposure evidenced to have an association with adverse pregnancy outcomes [6–9]. Stillbirth, intrauterine growth retardation, low birth weight, congenital anomalies, neural tube defects, and impaired growth in the first years of life are some of the known visible adverse pregnancy outcomes due to various environmental exposures during pregnancy [1, 10, 11]. Various environmental exposures may also cause invisible changes in certain biological functions and can increase the risk of disease and dysfunction later in life [1, 2, 12, 13].

Though maternal characteristics and obstetric practices play an important role in contributing to adverse birth outcomes, several environmental risk factors have been studied for possible roles in influencing pregnancies and resulting in adverse birth outcomes which have a significant impact on mortality, morbidity, and healthcare costs [1, 2, 4, 14]. The changing lifestyle both in urban and rural communities exacerbates the widespread use of different chemicals in different human activities that puts pregnant women at high risk of these environmental exposures [4, 11, 15].

In Ethiopia, the evidence on the association between environmental pollution and adverse pregnancy outcomes is particularly strong for low birth weight, preterm birth, and birth

defects with exposure to household air pollution [6, 16, 17], active and passive prenatal cigarette smoking [18–20] and pesticide use for agricultural activities [21–23]. Based on further analysis results of Ethiopian demography and health survey from 2000 to 2016, small birth weight prevalence is increasing from 7 to 13.2 percent [24].

It is also common to see Ethiopian women engaged in different agricultural, industrial, and other activities until their late pregnancy period which led to maternal exposure to chemicals in the workplace before and during pregnancy [25, 26]. Because they plant food for their families, cook meals, buy everyday products, wash clothes, and clean the house during which they or their family are exposed to various chemicals [27, 28]. Chemical pesticide uses in Ethiopia has been almost a threefold increase within a decade mainly due to the expansion of modern agricultural activities including commercial horticultural farms and small-scale irrigated farms [25, 29].

Though the body of scientific evidence links these environmental exposures with adverse pregnancy outcomes, the impacts have received less attention from clinicians compared with other maternal factors [12, 30]. The available evidences are also highly scattered and need systematic collecting from various epidemiological studies to obtain overall pooled summary estimates for an association between environmental exposures and pregnancy outcomes. Therefore, this systematic review and meta-analysis aimed at filling this gap by pooling relevant studies together to generate better evidence on the issue from which researchers and policymakers will be benefited.

## Objective

This paper aims to synthesize and generate the current pooled evidence from available epidemiological studies on environmental exposures and adverse pregnancy outcomes to facilitate further utilization of the evidences in Ethiopia.

## Methods

### Registration

This systematic review and meta-analysis was registered on PROSPERO with a protocol number CRD42022337140.

### Search strategies

Firsthand studies published in peer-reviewed journals were searched systematically using PubMed, Google Scholar, and the Cochrane Library databases. Repositories in Ethiopian universities were also visited for unpublished studies. Additional publications were identified based on references cited within the eligible studies. Internet (using the Google search engine) was also searched to maximize search efficiency. The above databases were searched following the new version of Preferred Reporting Items for Systematic Review and Meta-analysis (PRISMA) guideline for reporting protocol (Fig 1) and the PRISMA checklist to screen articles (S1 Checklist) [31]. Medical Subject Heading (MeSH) terms and free text words (Table 1) were used to identify relevant studies from the databases. The population, exposure, and outcome (PEO) terms were combined using the Boolean operator to search in the PubMed database.

Boolean operators like “AND”, and “OR” were used to maximize the sensitivity and specificity of our search strategy by bringing key concepts together to identify environmental exposures and pregnancy outcomes search in the PubMed database. The improvement of the search terms was made while doing a trial among randomly selected articles and looking for other relevant terms within each concept from retrieved papers. After some rounds of trial and refinement of the search term, we formulate the final search term for PubMed as follows;

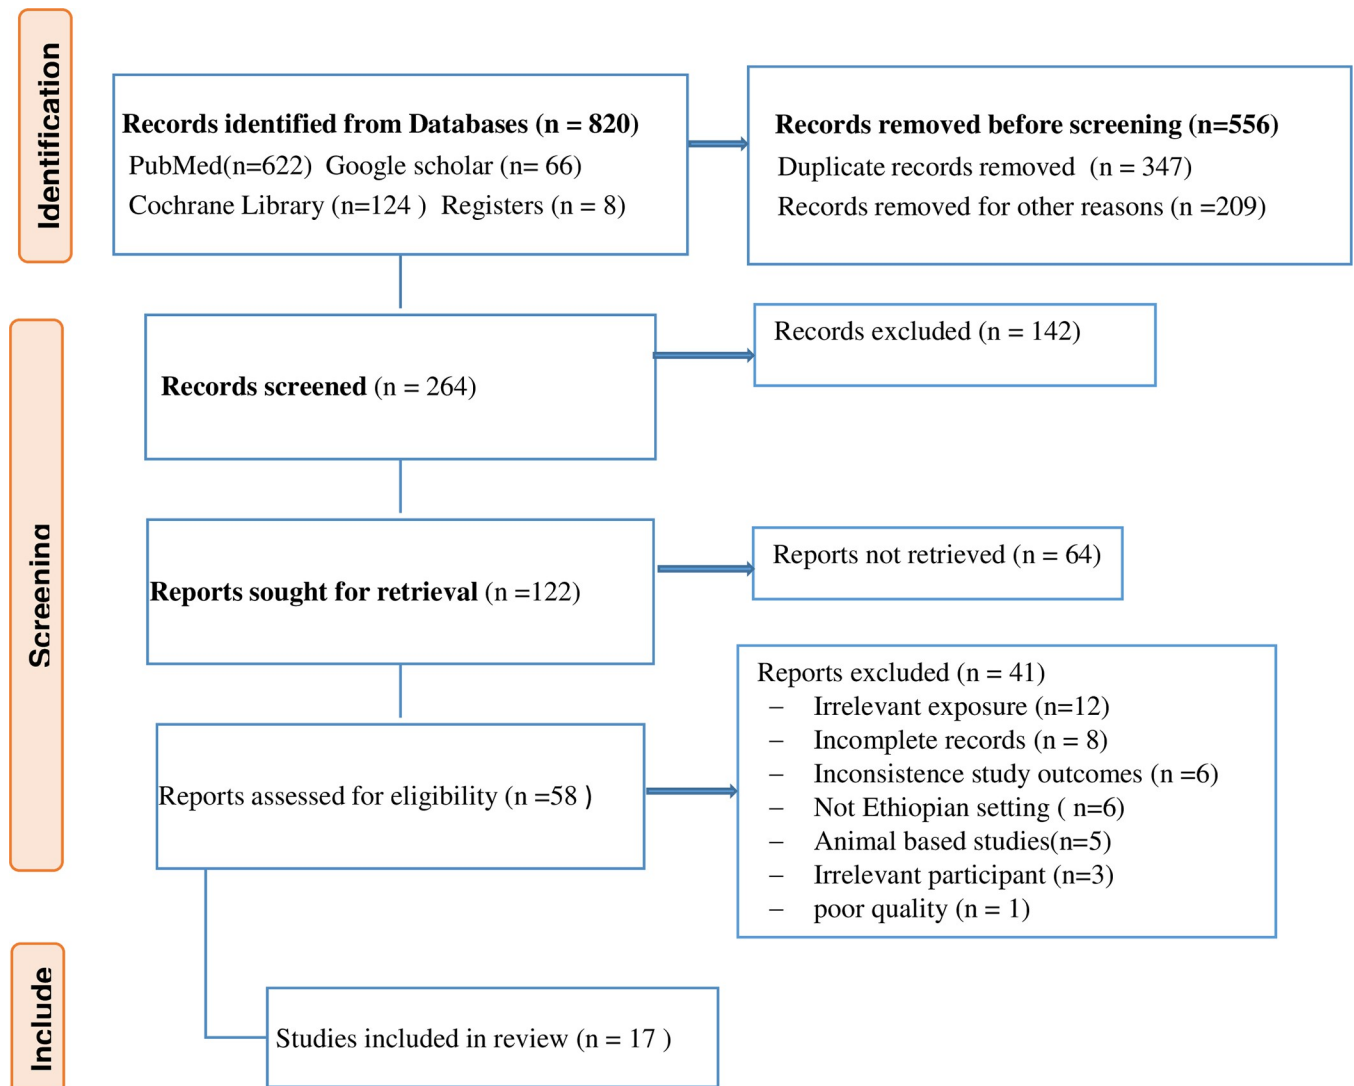

**Fig 1. PRISMA 2020 flow diagram for new systematic reviews which included searches of databases and registers only.**

<https://doi.org/10.1371/journal.pone.0288240.g001>

(Pregnant women) OR (gravida) OR (delivering women)) AND (indoor air pollution)) OR (biomass fuel use)) OR (solid fuel use)) OR (kitchen smoke)) OR (wood burning)) OR (household air pollution)) AND (cigarette smoking)) OR (passive smoker)) OR (active smoker)) OR (environmental tobacco smoker)) AND (pesticide exposure)) OR (herbicide use)) OR (use of insecticides)) OR (chemical use)) AND (pregnancy outcomes)) OR (low birth weight)) OR (preterm birth)) OR (stillbirth)) OR (congenital anomalies)) OR (birth defect)) OR (neural tube defect)) OR (small at gestational age)) AND (Ethiopia).

Since some databases do not support the use of Boolean or quotation, a standard search strategy is used only in PubMed, then later it is modified according to each specific database to get the best relevant results. Therefore, we modified the initial search terms for each database to get appreciated results. The detailed search strategy for each database is found in as [S1 Table](#). Two reviewers (HD and BG) independently conducted the searches and assessed eligibility. The final selection of studies was based on consensus, with arbitration by a third reviewer (ST or AB) in the case of disagreement.

Table 1. Search words.

| Sources of chemicals | Exposure                                                                                                                                                                              |                                                                                                                                                                                                                       | Outcome measures                                                                                                                                   |                                                                                                                                                                                                                                          |
|----------------------|---------------------------------------------------------------------------------------------------------------------------------------------------------------------------------------|-----------------------------------------------------------------------------------------------------------------------------------------------------------------------------------------------------------------------|----------------------------------------------------------------------------------------------------------------------------------------------------|------------------------------------------------------------------------------------------------------------------------------------------------------------------------------------------------------------------------------------------|
|                      | MeSH terms                                                                                                                                                                            | Free text                                                                                                                                                                                                             | MeSH terms                                                                                                                                         | Free text                                                                                                                                                                                                                                |
| Biomass fuel use     | <ul style="list-style-type: none"> <li>• Indoor air pollution</li> <li>• Biofuel</li> <li>• biomass</li> <li>• Wood</li> <li>• Charcoal</li> <li>• cooking</li> <li>• coal</li> </ul> | <ul style="list-style-type: none"> <li>• Household air pollution</li> <li>• Domestic fuel</li> <li>• Kitchen smoke</li> <li>• Solid fuel</li> <li>• Firewood</li> <li>• crop residue</li> <li>• wood smoke</li> </ul> | <ul style="list-style-type: none"> <li>• Abortion</li> <li>• Miscarriage</li> </ul>                                                                | <ul style="list-style-type: none"> <li>• pregnancy outcomes</li> <li>• birth weight</li> <li>• Preterm birth</li> <li>• Stillbirth</li> <li>• premature birth</li> <li>• premature infant</li> <li>• small at gestational age</li> </ul> |
| Cigarette smoking    | <ul style="list-style-type: none"> <li>• Smoking</li> <li>• Cigarette</li> <li>• Tobacco</li> <li>• substance</li> </ul>                                                              | <ul style="list-style-type: none"> <li>• Cigarette smoking</li> <li>• Tobacco smoking</li> <li>• Active smoker</li> <li>• Passive smoker</li> <li>• Env'tal tobacco smoking</li> <li>• substance use</li> </ul>       | <ul style="list-style-type: none"> <li>• Abortion</li> <li>• Premature</li> <li>• Preterm</li> <li>• Prematurity</li> <li>• Small birth</li> </ul> | <ul style="list-style-type: none"> <li>• Low birth weight</li> <li>• Small at gestational age</li> <li>• Premature birth</li> <li>• Preterm birth</li> </ul>                                                                             |
| Use of pesticide     | <ul style="list-style-type: none"> <li>• Pesticide</li> <li>• Chemicals</li> <li>• Herbicides</li> <li>• Insecticides</li> </ul>                                                      | <ul style="list-style-type: none"> <li>• Pesticide exposure</li> <li>• Use of pesticide</li> <li>• Use of chemicals</li> <li>• Use of herbicides</li> <li>• Use of insecticides</li> </ul>                            | <ul style="list-style-type: none"> <li>• Birth defects</li> </ul>                                                                                  | <ul style="list-style-type: none"> <li>• Congenital anomalies</li> <li>• Neuro tube defects</li> <li>• Adverse birth outcomes</li> </ul>                                                                                                 |

<https://doi.org/10.1371/journal.pone.0288240.t001>

The search was built based on the population, exposure, and outcome (PEO) research question formulation strategy. Articles published up to May 30, 2022, from the multiple database searches were collated and duplicates were removed. All articles resulting from the databases were imported into one endnote library and duplicates were removed.

### Inclusion and exclusion

All observational studies (cross-sectional, case-control, and cohort) reported the association between environmental exposure (indoor air pollution, cigarette smoking, and pesticide exposure) and adverse pregnancy outcomes (low birth weight, preterm birth, and birth defects including neural tube defect) and conducted in Ethiopia were eligible for this systematic review and meta-analysis. Studies published Up to May 30, 2022, only in the English language were included mainly to avoid mistakes in the translation process. Other studies were excluded due to the following reasons: (a) articles that did not provide calculably or reported ORs and 95% CIs, (b) review studies, (c) none related to the above specified environmental exposures and pregnancy outcomes, and (d) animal or case studies.

### Risk of bias assessment

Three authors (HD, ST, and AB) independently assessed the risk of bias for each article using the Newcastle–Ottawa Scale (NOS) quality assessment tool (adapted for cross-sectional studies) [32]. This scale has three sections namely sample selection with maximum 5-star scores, comparability of the subjects in different outcomes with maximum 2-star scores, and outcome measurement with maximum 3-star scores. The risk of bias for case-control studies was assessed using Newcastle—Ottawa quality assessment tool for case-control and cohort studies [33]. This scale also has three similar sections (selection of cases rated maximum of 4-star scores, comparability of the case and control groups rated maximum of 2-star scores, and exposure measurement rated maximum of 4-star scores). In the NOS tool, authors rated each item using stars. An overall score was determined by adding all the items' scores as stars equal one, while no stars equal zero. All studies were rated from a total of 10 scale scores and the

result of each study against each criterion was reported as a separate supporting information in excel form ([S1 Data](#)).

### Data extraction

All the necessary data were extracted using a customized form based on the Cochrane Public Health Group data extraction form and cross-checked to avoid errors. The data extraction forms were designed to be tailored to the review questions. One author (HD) developed the first draft of the data extraction form to gather information on the items of interest. This was reviewed by ST and complemented and revised after discussion. Two authors (BG and AB) piloted the data extraction forms and extracted the information of interest from the included studies using the final version of the extraction form. One of the major modifications added after piloting the data extraction form was the formulation of the additional table ([Table 3](#)) containing the methodological approaches of the studies included.

The variables extracted were determined based on the review questions. Extracted data items were cross-checked between the reviewers, with any disagreement being resolved through consensus or via arbitration by a third reviewer if necessary (HD). The data extraction format was designed to include first author, publication year, study type, sample size, types of exposure, types of birth outcome (low birth weight and preterm birth), odds ratio with 95% CI and publication history ([Table 2](#)). In addition, study setting, exposure comparators, case ascertainment, confounder adjustment methods, and quality assessment scores were abstracted from each study ([Table 3](#)).

### Outcome measurement

The outcome of this review is to determine the association between prenatal exposure to environmental risks (household air pollution, active and passive cigarette smoking, and pesticide exposure) and adverse pregnancy outcomes (low birth weight, preterm birth, and birth defects) as these are the most reported variables. Household air pollution exposure was assessed qualitatively based on the types of fuel used in the households, the location of the kitchen from the main house, the presence of windows, cooking frequency, and time spent in the kitchen. The comparison was made between low-pollution fuels (Electricity, liquefied petroleum gas (LPG), and biogas) and high-pollution fuels (charcoal, wood, crops, straw, and animal dung). Whereas cigarette smoking and pesticide exposures were assessed based on the self-reported response of the respondents about their exposure statuses as active or passive smoker or nonsmoker and pesticide user or nonuser. The pooled odds ratio with its 95% CI was calculated based on outcomes from the primary studies. All exposure and outcomes ascertainment techniques for each study are reported in a separate table ([Table 3](#)).

### Data processing and analysis

All relevant extracted data were analyzed using comprehensive meta-analysis (CMA 2.0) and MetaXL version 5.3 software. Heterogeneity among included studies was assessed using Cochran's Q test and  $I^2$  statistics with its p-value. As heterogeneity between studies in design, geographic location, exposure to different biomass fuels, different outcome measurement methods, different confounding factors, and methodological differences are expected, a random-effects meta-analysis model was used to compute the pooled estimate. The standard errors of the studies were plotted to detect asymmetry in the distribution of studies.

In addition, the Doi plot (a symmetrical mountain-like plot) with Luis Furuya-Kanamori (LFK) index was used to assess publication bias. Because the Doi plot is more visible than the funnel plot to observe the symmetry of the two areas of the graph and the LFK index is

**Table 2. Description of the included studies for computing the associated factors adverse pregnancy outcomes in Ethiopia.**

| Author, year                      | Study period | Study design    | Region        | Sample size | Outcome | Prevalence | Exposure                              | AOR (95% CI)        | Publication history |
|-----------------------------------|--------------|-----------------|---------------|-------------|---------|------------|---------------------------------------|---------------------|---------------------|
| Admasie et al., 2018 [16]         | 2017         | Cross-sectional | SNNPR         | 1042        | LBW     | 16.3       | Biomass fuel use                      | 3.83 (1.95–15.35)   | Published           |
|                                   |              |                 |               |             |         |            | NO separate kitchen                   | 2.27(1.88–5.88)     |                     |
|                                   |              |                 |               |             |         |            | No window                             | 4.79 (1.56–14.69)   |                     |
|                                   |              |                 |               |             |         |            | Cooking time > 3 hrs/d                | 2.45 (1.16–5.21)    |                     |
| Demelash et al, 2015 [6]          | 2013         | Case control    | Oromia        | 383         | LBW     | -          | Firewood fuel use                     | 2.70 (1.01–7.17)    | Published           |
|                                   |              |                 |               |             |         |            | Kerosene fuel use                     | 8.90 (2.54–31.11)   |                     |
|                                   |              |                 |               |             |         |            | No separate kitchen                   | 2.6 0(1.36–4.85)    |                     |
|                                   |              |                 |               |             |         |            | Cow dung fuel use                     | 14.4 (4.08–50.97)   |                     |
| Kanno et al, 2021 [34]            | 2016         | Cross-sectional | Nationwide    | 10,014      | LBW     | 25.9       | No separate kitchen                   | 1.30 (1.10–1.60)    | Published           |
| Emebet D and Nigusie D, 2017 [7]  | 2014         | Case-control    | AA            | 347         | LBW     | -          | Passive smoking                       | 1.86 (1.08, 4.91)   | Published           |
| Tsegaye M & Yewbmirt S, 2020 [18] | 2018–2019    | Cross-sectional | SNNPR         | 472         | LBW     | 34.1       | Cigarette smoking                     | 4.35 (2.46, 7.69)   | Published           |
| Alekaw Sema et al., 2019 [19]     | 2018         | Cross-sectional | Dire Dawa     | 431         | LBW     | 21         | Cigarette smoking during pregnancy    | 3.97 (1.59, 9.88)   | Published           |
| Mingude et al, 2020 [20]          | 2018         | Case-control    | SNNPR         | 300         | LBW     |            | passive smoking                       | 4.73 (1.42–15.7)    | Published           |
| Halil et al, 2019 [35]            | 2019         | Cross-sectional | SNNPR         | 363         | LBW     | 12.7       | having a history of cigarette smoking | 5.85 (1.18, 28.92)  | Published           |
| Bayew Kelkay et al, 2019 [36]     | 2018         | Cross-sectional | Tigray        | 325         | PTB     | 16.9       | cigarette smoking                     | 3.61(1.59–8.23)     | Published           |
| Deriba et al, 2021 [37]           | 2020         | Case-control    | Oromia        | 410         | PTB     |            | having a history of cigarette smoking | 3.77 (1.35,10.56)   | Published           |
| Alekaw Sema et al, 2021 [38]      | 2019         | Cross-sectional | Dire Dawa     | 412         | PTB     | 9          | Smoking during the current pregnancy  | 4.3, (1.29, 14.45)  | Published           |
| Taye et al.,2018 [39]             | 2018         | case-control    | AA and Amhara | 414         | CAS     | -          | Exposed to pesticides                 | 9.96(1.23–80.19)    | Published           |
| Mekonnen et al, 2020 [21]         | 2018         | Case-control    | Oromia        | 409         | CAS     | -          | Exposed to pesticides                 | 3.19 (1.31, 10.96). | Published           |
| Jemal et al, 2021 [40]            |              | case-control    | Oromia        | 418         | CAS     |            | Exposed to Pesticide                  | 4.76 (1.57–14.47)   | Published           |
| Abebe et al, 2021 [22]            | 2016–2018    | Case-control    | Oromia        | 1138        | CAS     | -          | Exposed to pesticides                 | 3.92 (1.27, 12.18)  | Published           |
| Gashaw et al, 2021 [23]           | 2019–2020    | Case-control    | Amhara        | 243         | NTD     |            | exposed to Pesticides                 | 5.34 (1.77, 16.05)  | Published           |
| Birhane et al. 2019 [41]          |              | Case-control    | Tigray        | 617         | NTD     |            | exposure to pesticide                 | 5 (0.150–166.60)    | Published           |
| Atlaw et al. 2019 [42]            |              | Case-control    |               | 462         | NTD     |            | exposure to pesticide                 | 0.19 (0.02–2.21)    | Published           |

LBW: low birth weight; PTB: preterm birth; NTD: neural tube defect

<https://doi.org/10.1371/journal.pone.0288240.t002>



**Table 3. Additional methodological approaches of the studies included in this systematic review and meta-analysis.**

| Authors                | Study Setting | Exposure Comparators                                                                                                                                                                                                                                          | Case Ascertainment                                   | Adjustment                                                                                                                                                                                                                                                                                                                                                                                                  |
|------------------------|---------------|---------------------------------------------------------------------------------------------------------------------------------------------------------------------------------------------------------------------------------------------------------------|------------------------------------------------------|-------------------------------------------------------------------------------------------------------------------------------------------------------------------------------------------------------------------------------------------------------------------------------------------------------------------------------------------------------------------------------------------------------------|
| Admasie et al.         | Communities   | <ul style="list-style-type: none"> <li>• Biomass vs electricity</li> <li>• Cooking place inside house vs outside</li> <li>• No window vs &gt; 3 windows</li> <li>• Improved stove vs open fire</li> <li>• Time spent cooking per day 3 hrs vs 1 hr</li> </ul> | • Mothers recall                                     | • Adjusted for wealth status, childbirth order, child spacing, mother and father education; sex of the child, number of windows, level of house ventilation; cooking place, time spent on cooking                                                                                                                                                                                                           |
| Demelash et al.        | Hospitals     | <ul style="list-style-type: none"> <li>• Using firewood vs electricity</li> <li>• Using kerosene vs electricity</li> <li>• Using cow dung vs electricity</li> <li>• House with no separate kitchen vs house with separate kitchen</li> </ul>                  | • Measurement using a balanced Seca scale            | • Adjusted for the birth interval, gravida, antenatal care (ANC) follow-up, gestational age at first ANC visit, deworming during pregnancy, maternal height, maternal weight, maternal BMI, history of pregnancy-related problems, history of alcohol drinking and khat chewing                                                                                                                             |
| Kanno et al.           | Communities   | <ul style="list-style-type: none"> <li>• Kitchen location inside the house vs outdoor</li> <li>• Kitchen location in another building vs outdoor</li> </ul>                                                                                                   | • Mothers recall                                     | Adjusted for <ul style="list-style-type: none"> <li>• Child factor (gender of the baby and birth order)</li> <li>• Maternal characteristics (Age of the mother at first birth, maternal, educational status, BMI, Anemia level, maternal Chat Chewing and Alcohol drinking)</li> </ul>                                                                                                                      |
| Emebet D & Nigusie D   | Hospitals     | • cigarette smokers vs nonsmokers                                                                                                                                                                                                                             | • Neonatal weighing scale                            | • Adjusted for weight gain, history of underweight, education, the income of the mother, and inter-pregnancy spacing                                                                                                                                                                                                                                                                                        |
| Tsegaye M & Yewbmirt S | Hospitals     | • Smokers vs nonsmokers                                                                                                                                                                                                                                       | • Digital Seca balance scale                         | • Adjusted for Maternal age, residency, educational status, occupation, marital status, birth interval, pregnancy type, ANC follow-up,                                                                                                                                                                                                                                                                      |
| Alekaw Sema et al.     | Hospitals     | • Active smokers vs nonsmokers                                                                                                                                                                                                                                | • Balanced Seca scale                                | • Adjusted for residency, level of education, pregnancy intention, nutritional counseling, contraception use, pregnancy complications, ANC follow-up, mode of delivery, the height of the mother, and gestational age                                                                                                                                                                                       |
| Mingude et al.         | Hospitals     | • Husband smoking vs nonsmoking                                                                                                                                                                                                                               | Standard weighing scale                              | • Adjusted for marital status, monthly income, parity, history of preterm birth, maternal Rh factor, ANC visit, time start ANC visit, number of ANC visits, gestational age, types of gestation, birth interval, nutritional counseling, iron and folic acid supplementation, MUAC, anemia, history of chronic illness, maternal smoking status, chat chewing, alcohol drinking, and husband smoking status |
| Bayew Kelkay et al.    | Hospitals     | Cigarette smokers vs nonsmokers                                                                                                                                                                                                                               | Mothers' recall                                      | • Adjusted for medication intake during the most recent pregnancy, history of hyperemesis, previous abortion, previous stillbirth, previous preterm birth, previous cesarean delivery, history of vaginal bleeding, history of diagnosed urinary tract infection, previous malaria attack, previous multiple deliveries                                                                                     |
| Deriba et al,          | Hospitals     | cigarette Smokers vs nonsmokers                                                                                                                                                                                                                               | ANC records (either LNMP or early ultrasound)        | Educational level, family size, history of alcohol drinking and adverse birth outcome, hemoglobin, current medical illness, ANC visit, and pregnancy status                                                                                                                                                                                                                                                 |
| Alekaw Sema et al,     | Hospitals     | Smokers vs nonsmokers                                                                                                                                                                                                                                         | Balanced Seca scale                                  | Residency, level of education, pregnancy intention, nutritional counseling, contraception use, pregnancy complications, ANC follow-up, mode of delivery, the height of the mother, and gestational age                                                                                                                                                                                                      |
| Mekonnen et al.        | Hospitals     | Pesticide user vs non user                                                                                                                                                                                                                                    | Medical examination                                  | Women's occupation, residence, number of infants, have been drinking alcohol and khat chewing                                                                                                                                                                                                                                                                                                               |
| Abebe et al.           | Hospitals     | Pesticide user vs non user                                                                                                                                                                                                                                    | Observation                                          | Folic acid use, drinking alcohol, cigarette smoking, x ray exposure, DM, maternal illness, use of antibiotics, drug use in first 3 months and 4 to 6 months, caffeine intake, khat chewing, asthma, hypertensive disorders of pregnancy, ANC follow up                                                                                                                                                      |
| Gashaw et al.          | Hospitals     | Pesticide users vs nonusers                                                                                                                                                                                                                                   | Gross visual examination and ultrasonography         | maternal residence, no formal paternal education, unplanned pregnancy, preconception illness (fever), taking any drug during preconception, history of NTDs                                                                                                                                                                                                                                                 |
| Kelelaw et al.         | Hospitals     | Smokers vs nonsmokers                                                                                                                                                                                                                                         | Either LNMP or 1 <sup>st</sup> -trimester ultrasound | Parity, medication intake, hyperemesis gravida, history of abortion, stillbirth, preterm, hospital admission malaria and vaginal bleeding, hemoglobin level, and number of ANC visits                                                                                                                                                                                                                       |
|                        |               | Tobacco smoking partner vs nonsmoker partner                                                                                                                                                                                                                  |                                                      | Weight gain, history of being underweight, education, the income of the mother, inter-pregnancy spacing,                                                                                                                                                                                                                                                                                                    |

(Continued)



Table 3. (Continued)

| Authors      | Study Setting | Exposure Comparators        | Case Ascertainment | Adjustment                                                                                                                                                                                                                          |
|--------------|---------------|-----------------------------|--------------------|-------------------------------------------------------------------------------------------------------------------------------------------------------------------------------------------------------------------------------------|
| Atlaw et al, | Hospitals     | Passive smoker vs nonsmoker | Mother's recall    | Adjusted for<br>• Mother age, religion, consanguinity, drug use during pregnancy, exposure to chemicals and toxins, history of abortion, family history of NTD, ANC follow-up, folic acid supplementation, and weight of the mother |

<https://doi.org/10.1371/journal.pone.0288240.t003>

more sensitive than Egger's regression to detect publication bias. LFK index  $<1$  indicates no asymmetry, between 1 and 2 suggests minor asymmetry, and index  $>2$  suggests major asymmetry [43]. Pooled odds ratio with 95% confidence intervals was presented in the forest plot format.

## Results

Initially, we identified 820 studies in our search. But only 17 (10 case-control and 7 cross-sectional) studies with 18,560 mother-infant pair participants were selected for data extraction as summarized in the PRISMA flowchart (Fig 1). Three studies (two cross-sectional and one case-control) reported the association between biomass fuel use and low birth weight. These papers have also stated the presence of an association between types of kitchens (separated or non-separated from the main house) and low birth weight. The pooled estimate was done for both reports. Seven (five cross-sectional and two case-control) studies analyzed the association between cigarette smoking and low birth weight. Additional seven case-control studies reported the presence of an association between pesticide exposure and birth defects.

### Household air pollution and low birth weight

Low birth weight infants are defined as weighing less than 2,500 grams at birth [44]. Birth weight and length of pregnancy are the two important predictors of neonatal and infant health [45, 46]. Exposure to biomass smoke inside the home from cooking with solid fuels adversely affects pregnancy outcomes [8, 47, 48] whereas more than 93 percent of households in Ethiopia use some type of solid fuel for cooking which is a known source of indoor air pollution [49]. In this paper, we computed the pooled odds ratio (OR) of biomass fuel use and low birth weight from three eligible papers [6, 16, 34]. Accordingly, infants born from mothers using biomass fuel were twice more likely to be born with low birth weight than infants born from clean fuel user mothers (OR = 2.10, 95% CI: 1.33–3.31).

Sensitivity analysis was performed step-by-step leave-one-out method to assess the impact of each primary study on the pooled OR and to detect the possible causes of heterogeneity between studies. After the exclusion of the highest OR 3.83, the pooled value reduced to 1.76 (95% CI: 1.34–2.31,  $p = 0.37$ ), and with the additional exclusion of the lowest OR study, 1.70 the pooled value became 3.19 (95% CI: 1.57–6.49,  $p = 0.63$ ). This indicates no significant outlier from the studies. In addition, Doi plots were used for detecting potential publication bias. The plot was asymmetrical with (LFK index = 5.07), suggesting major asymmetry. Accordingly, the results indicated the presence of potential publication bias (Fig 2B and 2C).

As cooking behavior is an important factor, it was considered in this review and the above studies were pooled to generate the association between cooking in a non-separated kitchen and low birth weight. The pooled odds ratio showed that infants from mothers who were cooking in the non-separated kitchen in the main house were nearly twice more likely to give birth with low birth weight babies than those who were cooking in separated kitchens from the

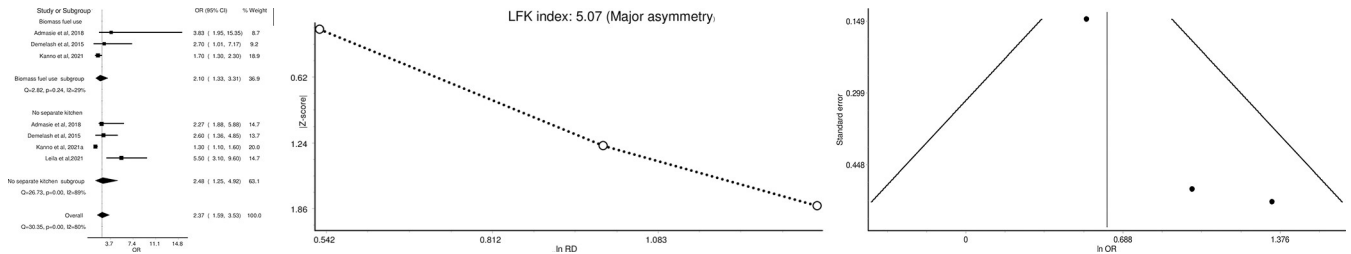

**Fig 2.** a: Forest plot of the pooled odds ratio (OR) and 95% confidence interval (CI) of the association between household solid biomass fuel use and low birth weight in Ethiopia. b: DOI plot of the pooled odds ratio (OR) of the association between household solid biomass fuel use and low birth weight in Ethiopia. c: Funnel plot of the pooled odds ratio (OR) of the associations between household solid biomass fuel use and low birth weight in Ethiopia.

<https://doi.org/10.1371/journal.pone.0288240.g002>

main house (OR = 2.48, 95% CI: 1.25–4.92). The overall odds of giving low birth weight babies among biomass fuel users and/or having no separate kitchen for cooking was estimated to be (OR = 2.37 (95% CI: 1.59–3.53) (Fig 2A).

### Exposure to cigarette smoke and low birth weight

It is also evidenced that infants born to active or passive cigarette smoker mothers weigh substantially less [9, 50] and are more likely to be preterm birth [36, 37, 51] than infants born to non-smoker women. In this review, we identified seven eligible studies that reported the association between active cigarette smoking [18, 19, 35–37] and passive or secondhand cigarette smoking [7, 20] and low birth weight in Ethiopia. The pooled estimate revealed that active cigarette smoker women are 4 times more likely to give low birth weight babies than nonsmoker women (OR = 4.11, 95% CI: 2.82–5.98). Whereas inhalation of particles from cigarette smoke during passive smoking has a twofold more risk to give low birth weight baby (OR = 2.63, 95% CI: 1.09–6.35). The overall pooled estimate of seven studies showed that inhalation of cigarette smoke actively and /or passively during pregnancy has 3.6 times more prone to give low birth weight babies than non-smokers (OR = 3.59, 95% CI: 2.60–4.96) (Fig 3A).

The sensitivity of each study was checked to identify smaller or larger reported odds ratios that could affect the pooled estimate by varying instability. But, the sensitivity analysis of this review showed no study has significantly affected the pooled result ranging from (OR = 3.28, 95%CI: 2.21–4.86) to (OR = 4.16, 95%CI: 2.90–5.95). To detect the potential publication bias for this group of studies, the Funnel and Doi plots were used. As a result, the asymmetry funnel plot suggested publication bias exists among these included articles (Fig 3B). This means studies with non-significant results may not have been published, which leads to the possibility that the pooled effect size may be overestimated. But, the Doi plot with (LFK index = 0.20), suggests no asymmetry (Fig 3C).

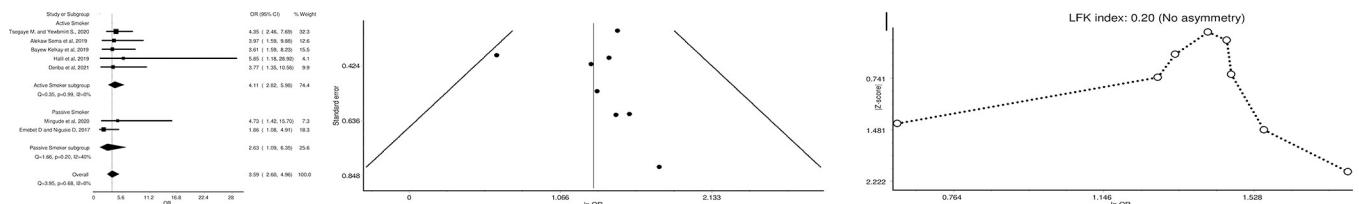

**Fig 3.** a: Forest plot of the pooled odds ratio (OR) and 95% confidence intervals (CIs) of the associations between cigarette smoking and low birth weight in Ethiopia. b: Doi plot of the pooled odds ratio (OR) of the associations between cigarette smoking and low birth weight in Ethiopia. c: Doi plot of the pooled odds ratio (OR) of the associations between cigarette smoking and low birth weight in Ethiopia.

<https://doi.org/10.1371/journal.pone.0288240.g003>

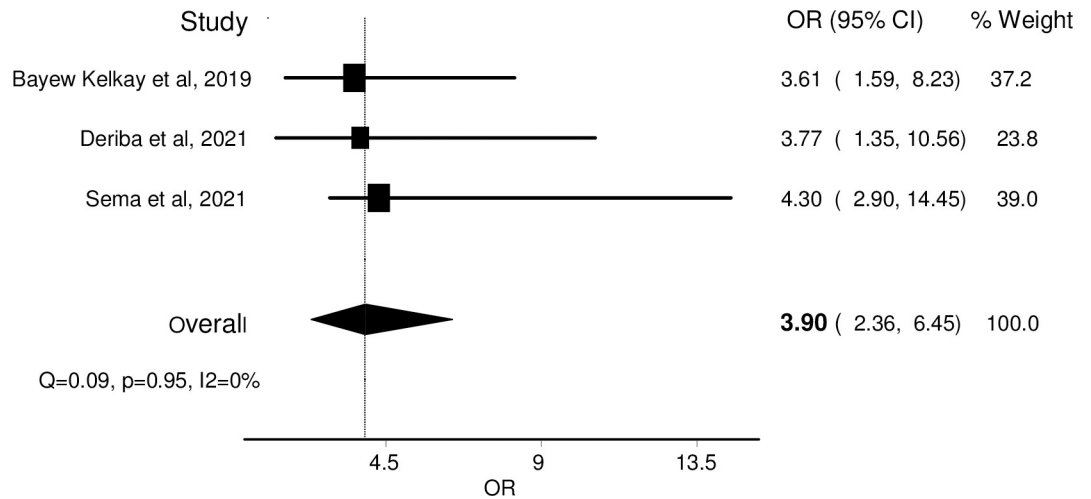

**Fig 4. Forest plot showing the association between cigarette smoking and preterm birth in Ethiopia.**

<https://doi.org/10.1371/journal.pone.0288240.g004>

### Exposure to cigarette smoke and preterm birth

Preterm birth is a live birth before 37 completed weeks of gestation [52]. Three studies [19, 36, 37] reported the association between prenatal active cigarette smoking and preterm birth in Ethiopia. The ORs from individual studies were combined and the pooled estimate was computed and telling as women who were exposed to cigarette smoke during their pregnancy period were nearly four times more likely to give preterm babies (OR = 3.90, 95% CI: 3.36–6.45) (Fig 4).

### Pesticides and birth defects

Suggestions are also growing and revealing that exposure to pesticides during pregnancy increased the risk of certain types of birth defects [25, 27, 53]. This review tried to assess pesticide exposure as one environmental exposure and its association with the occurrence of birth defects using five eligible papers [21–23, 40, 54] with 2,622 infant-mother pairs/subjects. The individual ORs were extracted with the highest OR estimate reported by Gashaw et al. (OR = 5.34, 95% CI: 1.77–16.05). The pooled estimate (OR = 4.44, 95% CI: 2.61–7.57) shows the existence of a statistically significant association between pesticide exposure and birth defects with the interpretation of mothers with pesticide exposure were four times more likely to give birth with babies having a certain birth defect than mothers with no pesticide exposure during pregnancy (Fig 5A).

The Doi plot with (LFK = 1.07) demonstrates the presence of minor symmetry with apriori concern about negative publication bias (studies showing a negative effect of pesticides more

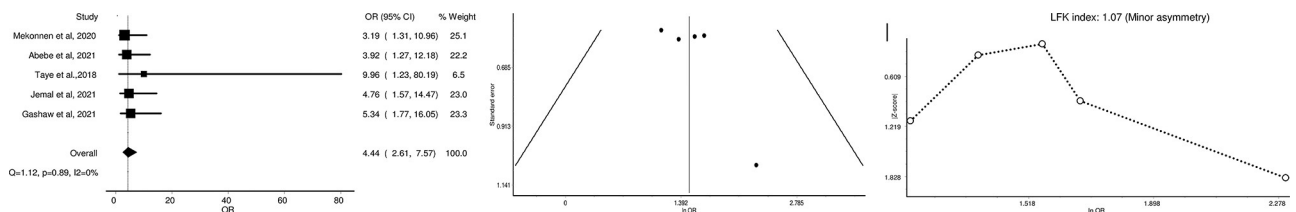

**Fig 5. a: Forest plot showing association between pesticide exposure and birth defect in Ethiopia. b: Funnel plot showing association between pesticide exposure and birth defect in Ethiopia. c: Doi plot showing association between pesticide exposure and birth defect in Ethiopia.**

<https://doi.org/10.1371/journal.pone.0288240.g005>

likely to be published) (Fig 5B). In contrast, there was some degree of subjectivity with the funnel plot due to the unclear scattering of the points on the plot (Fig 5C).

## Discussion

This study was conducted to examine the association between environmental exposure during pregnancy and pregnancy outcomes in Ethiopia. Environmental exposures included in this review are biomass fuel use for cooking, heating, and lighting, active and passive cigarette smoking, and exposure to pesticides. The pooled odds ratio in this review indicated that prenatal exposure to air pollution from biomass fuel increases the risk of giving a low birth weight baby by twofold.

The result is in agreement with a growing body of both epidemiological and toxicological research that links household air pollution from biomass fuel use with increased risks of low birth weight and preterm birth [55–58]. The result is also supported by other systematic reviews and meta-analysis studies done in sub-Saharan Africa [8] and worldwide [59]. Similarly, nationwide studies in Bangladesh and Zambia reported that the combustion of solid biomass fuels at home increases the risk of low birth weight and preterm birth [56, 60]. In Malawi, an association has observed a reduction in birth weight in infants born to mothers that use biomass fuels [61]. The risk of adverse outcomes in offspring due to perinatal exposure to cooking biomass fuels was investigated by Mi-Sun Lee and colleagues and reported increased odds of low birth weight and a significant reduction in the gestational age [62].

The possible plausible mechanism for the observed association can be explained in different ways hypothesized by different researchers [63, 64]. One plausible is that pollution particles from cooking smoke may move across the membranes of the lungs and be carried to other parts of the body, affecting placental function and the fetus [65]. Another potential mechanism is that pollutants may initiate systemic inflammation or oxidative stress that affects the health of both the pregnant woman and her baby [58].

Currently, it seems to be evidenced that maternal exposure to cigarette smoke (both active and passive) during pregnancy contributes to adverse pregnancy outcomes including a decrease in birth weight [9, 50, 66, 67]. In this review, maternal exposure to cigarette smoke during pregnancy was associated with low birth weight showing that low birth weight infants were four and three times as likely to be born to active and passive cigarette smoker mothers compared to those born to nonsmoker mothers respectively. Even the pooled OR for cigarette smoking was larger in magnitude compared with the results from biomass fuel smoke. The possible reasons may be inhalation of cigarette smoke during active or passive smoking, the particles are relatively concentrated, resulting in relatively high-risk increases for reproductive and infant health outcomes. [50, 66]. The association between cigarette smoking during pregnancy and low birth weight is also well established in different systematic review and meta-analysis studies [68–70]. As stated in Gómez-Roig et al., smoking is associated with placental abnormalities, preterm birth, stillbirth, or impaired growth and development, as well as intellectual impairment later in life [1]. Based on another large-scale case-control study in Jordan, neonates from active smoking mothers had significantly lower birth weights compared to neonates from Passive and nonsmoking women [9].

In this review, the pooled OR was computed from three studies [19, 36, 37] that reported the association between cigarette smoking and preterm birth (PTB). The estimated summary OR showed cigarette smoking during pregnancy was nearly 4 times more likely to give PTB compared to their unexposed counterparts. Similar evidence is reported by another systematic review and meta-analysis study [71]. The possible plausibility is that harmful nicotine and other chemicals in cigarettes have effects on human germ cells and are known to have adverse effects on the development of the embryo, especially during organogenesis [72].

Though scientific evidence is surplus on the influence of multiple medical and socio-economic statuses of pregnant women on birth defects, it is also suspected to be associated with exposure to pesticides. Wide-ranging research worldwide has identified potential associations between in-utero pesticide exposure and several adverse birth outcomes [73]. This study also shows the significant association between exposure to pesticides and birth defects in Ethiopia. Accordingly, it was found that women with a history of pesticide exposure during pregnancy were 4 times more likely to give birth to newborns with birth defects than those with no history of exposure to a pesticide. The result is in agreement with another systematic review conducted at the continental level in Africa, where mothers having pesticide exposure were 3 times more likely to have newborns with neural tube defects [74]. Maternal exposure to pesticides was significantly associated with birth defects as reported in another systematic review conducted in South Africa [75]. It revealed that women exposed to the pesticide were three times more likely to have newborns with neural tube defects than women who were not exposed to the pesticide [11]. Similarly, a report by Nieuwenhuijsen et al. from a summary of meta-analyses of epidemiological studies revealed that occupational exposure to pesticides and solvents is significantly associated with some congenital anomalies [2].

### Strength and limitation

Our effort to maximize the search efficiency during retrieving all available relevant literature could be mentioned as the main strength of this paper. But, the number of original studies conducted on environmental exposure and pregnancy outcomes is very limited in Ethiopia. This may potentially affect the magnitude of pooled estimated values. The way the selected studies measured the exposure status and outcome variables differed, which potentially has an impact on the summary results due to misclassifications. Some confounding factors, such as the type of cooking stoves, personal exposure, and the availability of windows or chimneys also remained uncontrolled in some studies. In addition, since this review is based on the available observational (case-control and cross-sectional) studies, all the methodological and statistical limitations of the primary studies have an impact on the quality of this systematic review and meta-analysis work. Especially, recall and selection bias cannot be eliminated. Since the number of studies included in this systematic review and meta-analysis work is relatively small (< 20), the Chi-squared statistical test (Q test) and the  $I^2$  test for heterogeneity should be interpreted very cautiously.

### Conclusion

Household air pollution from biomass fuel use, active and passive cigarette smoking, and pesticide exposure is associated with environmental risk factors for low birth weight and birth defects in Ethiopia. Pregnant women living in households that utilize biomass fuel or are exposed to cigarette smoke were more at risk of giving low birthweight babies than mothers who live in households that utilizes clean energy sources or non-cigarette smokers. In this review, it is also evidenced that pesticide exposure has a positive association with birth defects including neuro tube defects. Therefore, Pregnant and lactating women should be aware of the risks of indoor air pollution, pesticide exposure, cigarette smoking, and another environmental risk factor during their pregnancy period. Promoting clean and effective solid fuels and improved and efficient stoves at the household level will help to reduce household air pollution-related adverse health effects, specifically low birth weight. Future studies should pay more attention to effective exposure measurement including personal and biomarker sampling for different environmental pollutants during the whole gestation period.

## The implication of the study

Adverse pregnancy outcomes including low birthweight, preterm birth, neural tube defect, and congenital anomalies are significant public health problems in Ethiopia. Because of Exposure of women to various environmental chemicals (mainly indoor air pollution due to biomass fuel use, active and passive tobacco smoking, and use of pesticides during agricultural activities) before and during pregnancy leads women to inhale them for hours which consequently leads to adverse pregnancy outcomes. Despite the progress made to reduce the burden of maternal and infant mortality and morbidity in the country, the magnitude of these adverse pregnancy outcomes is still one of the challenges that need to be addressed. Identifying the association between biomass fuel use, cigarette smoking, and pesticide use with pregnancy outcomes can help the efforts to revise, amend or implement treatment guidelines for the clinician and contribute valuable imputes for policy and decision-makers.

## Supporting information

**S1 Checklist. PRISMA\_2020\_checklist.**  
(DOCX)

**S1 Data. Risk of bias assessment result.**  
(XLS)

**S2 Data.**  
(CSV)

**S1 Table. Manipulation guides for online database searches.**  
(DOCX)

**S2 Table. Detailed search strategy for twelve database searches.**  
(DOCX)

## Author Contributions

**Conceptualization:** Habtamu Demelash Enyew.

**Data curation:** Bethlehem Getachew Bogale, Abebe Beyene Hailu, Seid Tiku Mereta.

**Formal analysis:** Habtamu Demelash Enyew.

**Investigation:** Bethlehem Getachew Bogale.

**Methodology:** Habtamu Demelash Enyew, Bethlehem Getachew Bogale, Abebe Beyene Hailu.

**Project administration:** Habtamu Demelash Enyew, Abebe Beyene Hailu.

**Validation:** Abebe Beyene Hailu, Seid Tiku Mereta.

**Visualization:** Seid Tiku Mereta.

**Writing – original draft:** Seid Tiku Mereta.

**Writing – review & editing:** Habtamu Demelash Enyew.

## References

1. Gómez-Roig M.D., et al., Environmental exposure during pregnancy: influence on prenatal development and early life: a comprehensive review. *Fetal diagnosis and therapy*, 2021. 48(4): p. 245–257. <https://doi.org/10.1159/000514884> PMID: 33735860



2. Nieuwenhuijsen M.J., et al., Environmental risk factors of pregnancy outcomes: a summary of recent meta-analyses of epidemiological studies. *Environmental health*, 2013. 12(1): p. 1–10. <https://doi.org/10.1186/1476-069X-12-6> PMID: 23320899
3. Barnes Michael D., H. T.L., Goates Michael C. and Justin M. Packer Intersystem Implications of the Developmental Origins of Health and Disease: Advancing Health Promotion in the 21st Century. *Health-care*, 2016. 4(45).
4. Xia Y., *Early-life Environmental Exposure and Disease: Facts and Perspectives*. 2020: Springer Nature.
5. Lacagnina S., *The Developmental Origins of Health and Disease (DOHaD)*. 2019.
6. Demelash H., et al., Risk factors for low birth weight in Bale zone hospitals, South-East Ethiopia: a case–control study. *BMC pregnancy and childbirth*, 2015. 15(1): p. 1–10. <https://doi.org/10.1186/s12884-015-0677-y> PMID: 26463177
7. Dendir E. and Deyessa N., Substance use and birth weight among mothers attending public hospitals: A case control study. *Ethiopian Journal of Health Development*, 2017. 31(1): p. 27–35.
8. Gebremeskel Kanno G. and Hussen Kabthymmer R., Association of low birthweight with indoor air pollution from biomass fuel in sub-Saharan Africa: A systemic review and meta-analysis. *Sustainable Environment*, 2021. 7(1): p. 1922185.
9. Hamadneh S. and Hamadneh J., Active and Passive Maternal Smoking During Pregnancy and Birth Outcomes: A Study From a Developing Country. *Annals of Global Health*, 2021. 87(1). <https://doi.org/10.5334/aogh.3384> PMID: 34900622
10. Triche E.W. and Hossain N. Environmental factors implicated in the causation of adverse pregnancy outcome. in *Seminars in perinatology*. 2007. Elsevier.
11. Zheng T., et al., Effects of environmental exposures on fetal and childhood growth trajectories. *Annals of global health*, 2016. 82(1): p. 41–99. <https://doi.org/10.1016/j.aogh.2016.01.008> PMID: 27325067
12. Heggese B.C. and Aleman A., Early-life environmental exposures and childhood growth: A comparison of statistical methods. *PloS one*, 2018. 13(12): p. e0209321. <https://doi.org/10.1371/journal.pone.0209321> PMID: 30557389
13. Miranda M.L., Maxson P., and Edwards S., Environmental contributions to disparities in pregnancy outcomes. *Epidemiologic reviews*, 2009. 31(1): p. 67–83.
14. Spann K., et al., The impact of early-life exposure to air-borne environmental insults on the function of the airway epithelium in asthma. *Annals of global health*, 2016. 82(1): p. 28–40. <https://doi.org/10.1016/j.aogh.2016.01.007> PMID: 27325066
15. Organization, W.H., WHO recommendations on interventions to improve preterm birth outcomes. 2015.
16. Admasie A., Kumie A., and Worku A., Association of household fuel type, kitchen characteristics and house structure with child size at birth in Wolaita Sodo, Southern Ethiopia. *The Open Public Health Journal*, 2018. 11(1).
17. Kanno G.G., et al., Investigating the effect of biomass fuel use and Kitchen location on Maternal Report of Birth size: A Cross-Sectional Analysis of 2016 Ethiopian Demographic Health Survey data. *medRxiv*, 2020.
18. Mehare T. and Sharew Y., Prevalence and associated factors of low birth weight among term newborns in Dilla Town, Southern Ethiopia. *International Journal of Pediatrics*, 2020. 2020. <https://doi.org/10.1155/2020/8394578> PMID: 32802084
19. Sema A., et al., Associated factors with low birth weight in Dire Dawa City, Eastern Ethiopia: a cross-sectional study. *BioMed research international*, 2019. 2019. <https://doi.org/10.1155/2019/2965094> PMID: 31886197
20. Mingude A.B., et al., Determinants of low birth weight among live birth newborns delivered at public hospitals in Gamo Gofa zone, South Ethiopia: unmatched case control study. *SAGE open medicine*, 2020. 8: p. 2050312120940544. <https://doi.org/10.1177/2050312120940544> PMID: 32782793
21. Mekonnen A.G., et al., Modifiable risk factors of congenital malformations in bale zone hospitals, South-east Ethiopia: an unmatched case-control study. *BMC pregnancy and childbirth*, 2020. 20(1): p. 1–9. <https://doi.org/10.1186/s12884-020-2827-0> PMID: 32106830
22. Abebe S., et al., Risk factors associated with congenital anomalies among newborns in southwestern Ethiopia: A case-control study. *PloS one*, 2021. 16(1): p. e0245915. <https://doi.org/10.1371/journal.pone.0245915> PMID: 33508017
23. Gashaw A., et al., Risk factors associated to neural tube defects among mothers who gave birth in North Shoa Zone Hospitals, Amhara Region, Ethiopia 2020: Case control study. *PloS one*, 2021. 16(4): p. e0250719. <https://doi.org/10.1371/journal.pone.0250719> PMID: 33901231

24. Kebede A., et al., Trends and Determinants of Small Birth Weight in Ethiopia: Further analysis of Ethiopian Demographic and Health Surveys. *Ethiopian Journal of Health Sciences*, 2021. 31(2). <https://doi.org/10.4314/ejhs.v31i2.13> PMID: 34158782
25. Afata T.N., et al., Prevalence of Pesticide Use and Occupational Exposure Among Small-Scale Farmers in Western Ethiopia. *Environmental Health Insights*, 2022. 16: p. 11786302211072950. <https://doi.org/10.1177/11786302211072950> PMID: 35095275
26. Mekonen S., et al., Exposure to organochlorine pesticides as a predictor to breast cancer: A case-control study among Ethiopian women. *PloS one*, 2021. 16(9): p. e0257704. <https://doi.org/10.1371/journal.pone.0257704> PMID: 34555072
27. Sarkar S., et al., The use of pesticides in developing countries and their impact on health and the right to food. 2021: European Union.
28. Caterbow A. and Johanna H., Women and Chemicals, The impact of hazardous chemicals on women. Netherlands, Women in Europe for a Common Future (WECF), 2016: p. 33–40.
29. Negatu B., Dugassa S., and Mekonnen Y., Environmental and health risks of pesticide use in Ethiopia. *Journal of Health Pollution*, 2021. 11(30): p. 210601. <https://doi.org/10.5696/2156-9614-11.30.210601> PMID: 34267988
30. Zilversmit Pao L., et al., The cumulative risk of chemical and nonchemical exposures on birth outcomes in healthy women: The fetal growth study. *International Journal of Environmental Research and Public Health*, 2019. 16(19): p. 3700. <https://doi.org/10.3390/ijerph16193700> PMID: 31581440
31. Page M.J., et al., The PRISMA 2020 statement: an updated guideline for reporting systematic reviews. *International Journal of Surgery*, 2021. 88: p. 105906. <https://doi.org/10.1016/j.ijsu.2021.105906> PMID: 33789826
32. Modesti P., Reboldi G., and Cappuccio F., Newcastle-Ottawa Quality Assessment Scale (adapted for cross sectional studies). *PLoS One*, 2016. 11(1): p. e0147601.
33. Peterson J., et al., The Newcastle-Ottawa scale (NOS) for assessing the quality of nonrandomised studies in meta-analyses. Ottawa: Ottawa Hospital Research Institute, 2011. 2(1): p. 1–12.
34. Kanno G.G., et al., Effect of biomass fuel use and kitchen location on maternal report of birth size: Cross-sectional analysis of 2016 Ethiopian Demographic Health Survey data. *Public Health in Practice*, 2021. 2: p. 100211. <https://doi.org/10.1016/j.puhip.2021.100211> PMID: 36101582
35. Halil H., et al., Low Birth Weight and Risk Factors among Newborns at Nigist Eleni Mohammed Memorial Referral Hospital, Southern Ethiopia: A Cross-Sectional Study. *Pediatr & Ther*, 2019. 9(07): p. 2161–0665.19.
36. Kelkay B., et al., Factors associated with singleton preterm birth in Shire Suhul general hospital, northern Ethiopia, 2018. *Journal of Pregnancy*, 2019. 2019. <https://doi.org/10.1155/2019/4629101> PMID: 31205788
37. Deriba B.S., Ayalew A.F., and Gebru A.A., Determinants of preterm birth in public hospitals in central Ethiopia: an unmatched case-control study. *F1000Research*, 2021. 10: p. 773.
38. Sema A., et al., Preterm birth and associated factors among mothers who gave birth in Dire Dawa, Ethiopia. *British Journal of Midwifery*, 2021. 29(6): p. 338–345.
39. Taye M., et al., Factors associated with congenital anomalies in Addis Ababa and the Amhara Region, Ethiopia: a case-control study. *BMC pediatrics*, 2018. 18(1): p. 1–11.
40. Jemal S., et al., Predictors of congenital anomalies among newborns in Arsi zone public hospitals, Southeast Ethiopia: a case-control study. *Italian Journal of Pediatrics*, 2021. 47(1): p. 1–9.
41. Berihu B.A., et al., Maternal risk factors associated with neural tube defects in Tigray regional state of Ethiopia. *Brain and Development*, 2019. 41(1): p. 11–18. <https://doi.org/10.1016/j.braindev.2018.07.013> PMID: 30075882
42. Atlaw D., et al., Neural tube defect and associated factors in Bale zone hospitals, southeast Ethiopia. *J Pregnancy Child Health*, 2019. 6(3): p. 412.
43. Furuya-Kanamori L., Barendregt J.J., and Doi S.A., A new improved graphical and quantitative method for detecting bias in meta-analysis. *International journal of evidence-based healthcare*, 2018. 16(4): p. 195–203. <https://doi.org/10.1097/XEB.000000000000141> PMID: 29621038
44. Cutland C.L., et al., Low birth weight: Case definition & guidelines for data collection, analysis, and presentation of maternal immunization safety data. *Vaccine*, 2017. 35(48Part A): p. 6492.
45. WHO, UNICEF-WHO low birthweight estimates: levels and trends 2000–2015. 2019, World Health Organization.
46. Stillerman K.P., et al., Environmental exposures and adverse pregnancy outcomes: a review of the science. *Reproductive sciences*, 2008. 15(7): p. 631–650.

47. Ahmed Z., et al., Exposure to biomass fuel and low child birth weight—Findings of Pakistan Demographic and Health Survey 2006–2007. *International Journal of Health System and Disaster Management*, 2015. 3(5): p. 19.
48. Awopeju O.F., Health Effect of Biomass Fuel Smoke, in *Environmental Emissions*. 2020, IntechOpen.
49. Tielsch J.M., et al., Exposure to indoor biomass fuel and tobacco smoke and risk of adverse reproductive outcomes, mortality, respiratory morbidity and growth among newborn infants in south India. *International journal of epidemiology*, 2009. 38(5): p. 1351–1363. <https://doi.org/10.1093/ije/dyp286> PMID: 19759098
50. Shea A.K. and Steiner M., Cigarette smoking during pregnancy. *Nicotine & Tobacco Research*, 2008. 10(2): p. 267–278. <https://doi.org/10.1080/14622200701825908> PMID: 18236291
51. USAID P. and GAPPS A., Profile of Preterm and Low Birth Weight Prevention and Care-Ethiopia.; 2017. 2019.
52. UNICEF A Neglected Tragedy The global burden of stillbirths: Report of the UN Inter-agency Group for Child Mortality Estimation. 2020.
53. Wang L., et al., Pesticide exposure during pregnancy and low birth weight. *WHO South-East Asia Journal of Public Health*, 2012. 1(3): p. 232–238. <https://doi.org/10.4103/2224-3151.207019> PMID: 28615549
54. Molla Taye M.A., Wondwossen Fantaye, Ermias Diro and Alemayehu Worku, Factors associated with congenital anomalies in Addis Ababa and the Amhara Region, Ethiopia: a case-control study. *BMC Pediatrics*, 2018. 18(142).
55. Epstein M.B., et al., Household fuels, low birth weight, and neonatal death in India: the separate impacts of biomass, kerosene, and coal. *International journal of hygiene and environmental health*, 2013. 216(5): p. 523–532. <https://doi.org/10.1016/j.ijheh.2012.12.006> PMID: 23347967
56. Khan M.N., et al., Household air pollution from cooking and risk of adverse health and birth outcomes in Bangladesh: a nationwide population-based study. *Environmental Health*, 2017. 16(1): p. 1–8.
57. Liu Y., et al., The association between air pollution and preterm birth and low birth weight in Guangdong, China. *BMC Public Health*, 2019. 19(1): p. 1–10.
58. WHO, Indoor air pollution from solid fuels and risk of low birth weight and stillbirth: report from a symposium held at the Annual Conference of the International Society for Environmental Epidemiology (ISEE), September 2005, Johannesburg. 2007.
59. Amegah A.K., Quansah R., and Jaakkola J.J., Household air pollution from solid fuel use and risk of adverse pregnancy outcomes: a systematic review and meta-analysis of the empirical evidence. *PloS one*, 2014. 9(12): p. e113920. <https://doi.org/10.1371/journal.pone.0113920> PMID: 25463771
60. Mulenga D., et al., Pregnancy Outcomes Associated with Chronic Indoor Air Pollution-Related Maternal Respiratory Ill Health in Ndola and Masaiti, Zambia. *Intern Med*, 2018. 8(269): p. 2.
61. Milanzi E.B. and Namacha N.M., Maternal biomass smoke exposure and birth weight in Malawi: Analysis of data from the 2010 Malawi Demographic and Health Survey. *Malawi medical journal*, 2017. 29(2): p. 160–165. <https://doi.org/10.4314/mmj.v29i2.16> PMID: 28955426
62. Das A.M. and Janardhanan R., Correspondence on: Household use of crop residues and fuelwood for cooking and newborn birth size in rural Bangladesh by Lee et al. *Occupational and Environmental Medicine*, 2022.
63. Ritz B. and Wilhelm M., Air pollution impacts on infants and children. *Southern California Environmental Report Card*, 2008: p. 2–6.
64. National Academies of Sciences, E., and Medicine, *Environmental Neuroscience: Advancing the Understanding of How Chemical Exposures Impact Brain Health and Disease*. 2020.
65. Lee K.K., et al., Adverse health effects associated with household air pollution: a systematic review, meta-analysis, and burden estimation study. *The Lancet Global Health*, 2020. 8(11): p. e1427–e1434. [https://doi.org/10.1016/S2214-109X\(20\)30343-0](https://doi.org/10.1016/S2214-109X(20)30343-0) PMID: 33069303
66. Kataoka M.C., et al., Smoking during pregnancy and harm reduction in birth weight: a cross-sectional study. *BMC pregnancy and childbirth*, 2018. 18(1): p. 1–10.
67. Leonardi-Bee J., Britton J., and Venn A., Secondhand smoke and adverse fetal outcomes in nonsmoking pregnant women: a meta-analysis. *Pediatrics*, 2011. 127(4): p. 734–741. <https://doi.org/10.1542/peds.2010-3041> PMID: 21382949
68. Bayih W.A., et al., The effect of substance use during pregnancy on neonatal outcomes in Ethiopia: A systematic review and meta-analysis. *Heliyon*, 2021. 7(4): p. e06740. <https://doi.org/10.1016/j.heliyon.2021.e06740> PMID: 33997369

69. Pereira P.P.d.S., et al., Maternal active smoking during pregnancy and low birth weight in the Americas: a systematic review and meta-analysis. *Nicotine & Tobacco Research*, 2017. 19(5): p. 497–505. <https://doi.org/10.1093/ntr/ntw228> PMID: 28403455
70. Salmasi G., et al., Environmental tobacco smoke exposure and perinatal outcomes: a systematic review and meta-analyses. *Acta obstetrica et gynecologica Scandinavica*, 2010. 89(4): p. 423–441. <https://doi.org/10.3109/00016340903505748> PMID: 20085532
71. Muchie K.F., et al., Epidemiology of preterm birth in Ethiopia: systematic review and meta-analysis. *BMC pregnancy and childbirth*, 2020. 20(1): p. 1–12.
72. Baldacci S., et al., Environmental and individual exposure and the risk of congenital anomalies: a review of recent epidemiological evidence. *Epidemiol Prev*, 2018. 42(3–4 Suppl 1): p. 1–34.
73. Rao, P., Reproductive health effects of pesticide exposure. 2008, Issues for Farmworker Health Service Providers.[online] Farmworker Justice . . . .
74. Atlaw D., et al., Magnitude and determinants of neural tube defect in Africa: a systematic review and meta-analysis. *BMC pregnancy and childbirth*, 2021. 21(1): p. 1–14.
75. Heeren G.A., Tyler J., and Mandeya A., Agricultural chemical exposures and birth defects in the Eastern Cape Province, South Africa A case–control study. *Environmental Health*, 2003. 2(1): p. 1–8.
