# Supplementary material for: Environmental exposures and adverse pregnancy outcomes in Ethiopia: A systematic review and meta-analysis
Source: PLoS One. 2023 Jul 12;18(7):e0288240. doi: 10.1371/journal.pone.0288240 (PMC10337917; doi:10.1371/journal.pone.0288240)
Supplement: S2 Data — (CSV) [file pone.0288240.s003.csv]

Search query: (Pregnant women) OR (gravida)) OR (delivering women)) AND (indoor air pollution)) OR (biomass fuel use)) OR (solid fuel use)) OR (kitchen smoke)) OR (wood burning)) OR (household air pollution)) AND (cigarette smoking)) OR (passive smoker)) OR (active smoker)) OR (environmental tobacco smoker)) AND (pesticide exposure)) OR (herbicide use)) OR (use of insecticides)) OR (chemical use)…
Year	Count
2022	133
2021	141
2020	116
2019	113
2018	68
2017	44
2016	35
2015	34
2014	29
2013	17
2012	10
